# Supplementary material for: Ionothermal synthesis and characterization of two zinc phosphates from a protic ionic liquid
Source: Royal Society of Chemistry journal article supplement (doi:10.1039/c3ce40563j), 2013-01-01
Supplement: c3ce40563j.pdf [file c3ce40563j.pdf]

## Supplementary Material

### Ionothermal synthesis and characterization of two zinc phosphates

#### from a protic ionic liquid

Sanying Li, Wei Wang, Lei Liu\* and Jinxiang Dong

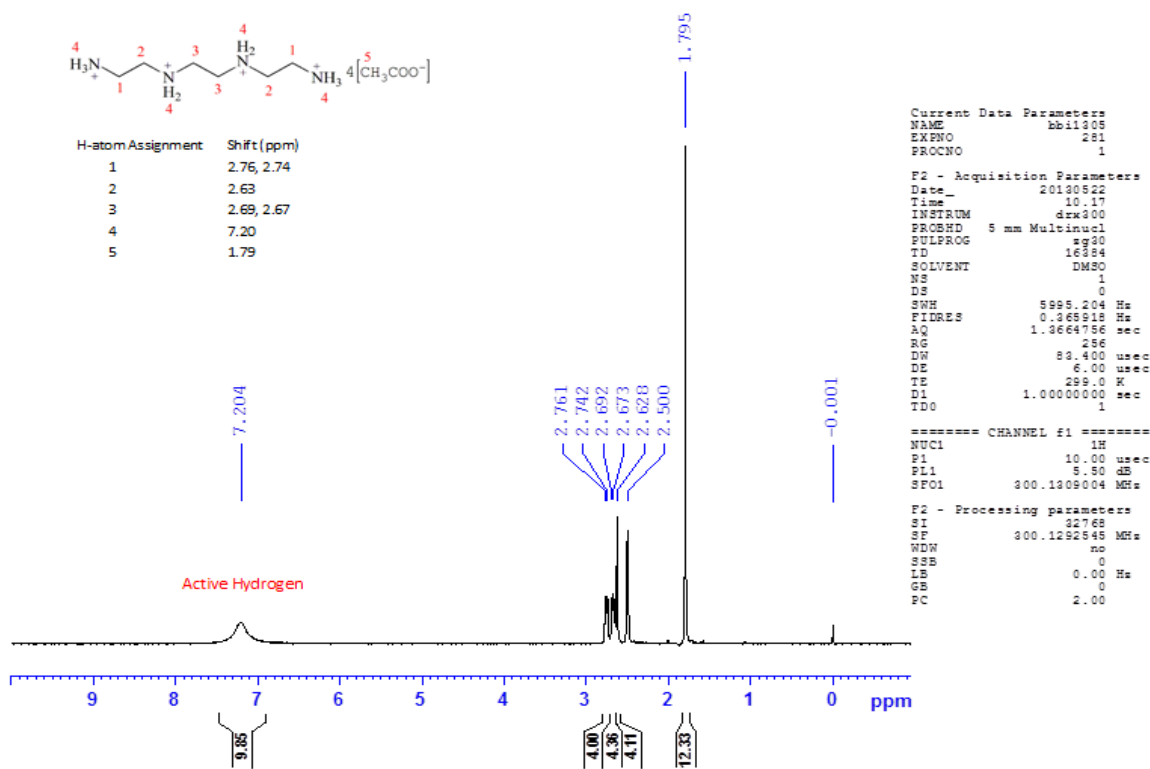

Figure S1  $^1\text{H}$ NMR spectrum of  $\text{H}_4\text{TETA}(\text{Ac})_4$

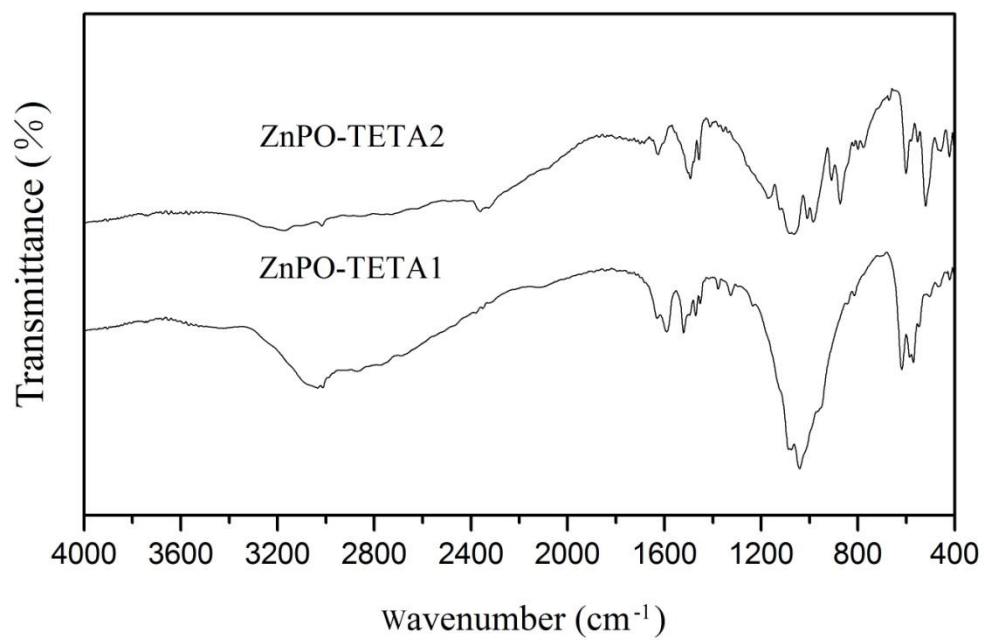

**Figure S2.** The FT-IR spectra of ZnPO-TETA1 and ZnPO-TETA2 samples

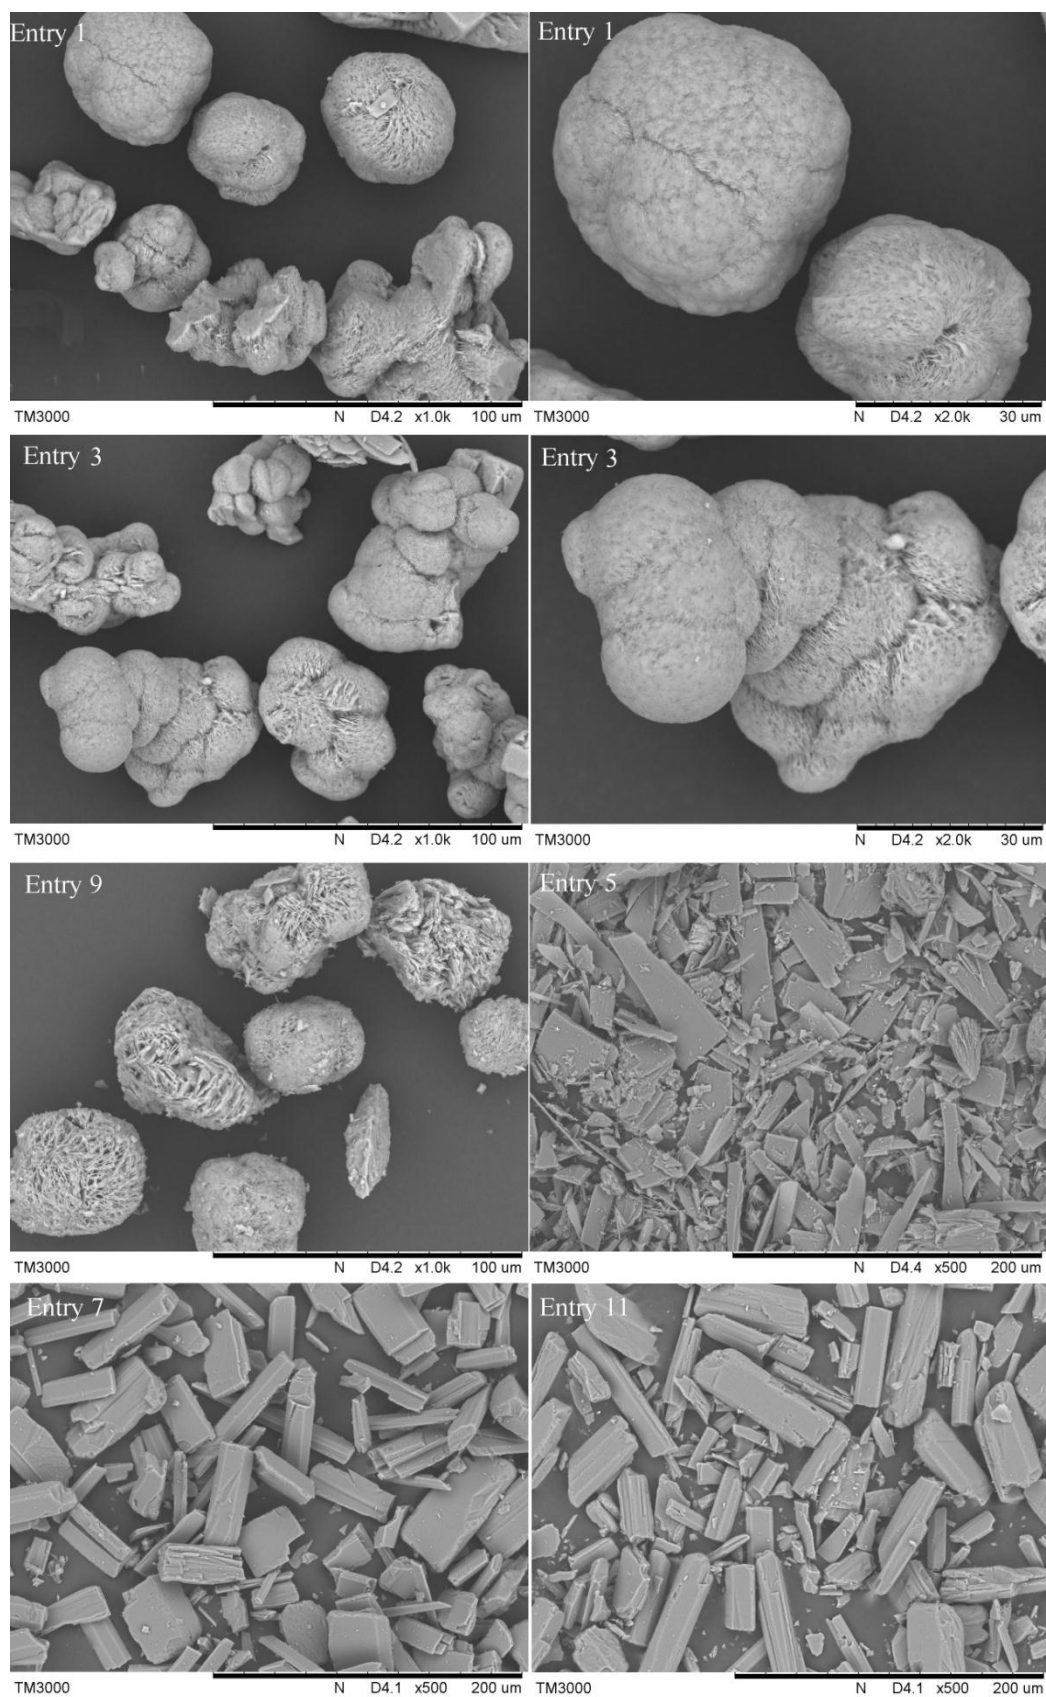

**Figure S3** SEM images of ZnPO-TETA1 and ZnPO-TETA2 samples obtained under different reaction conditions (see Table 1 in main text).

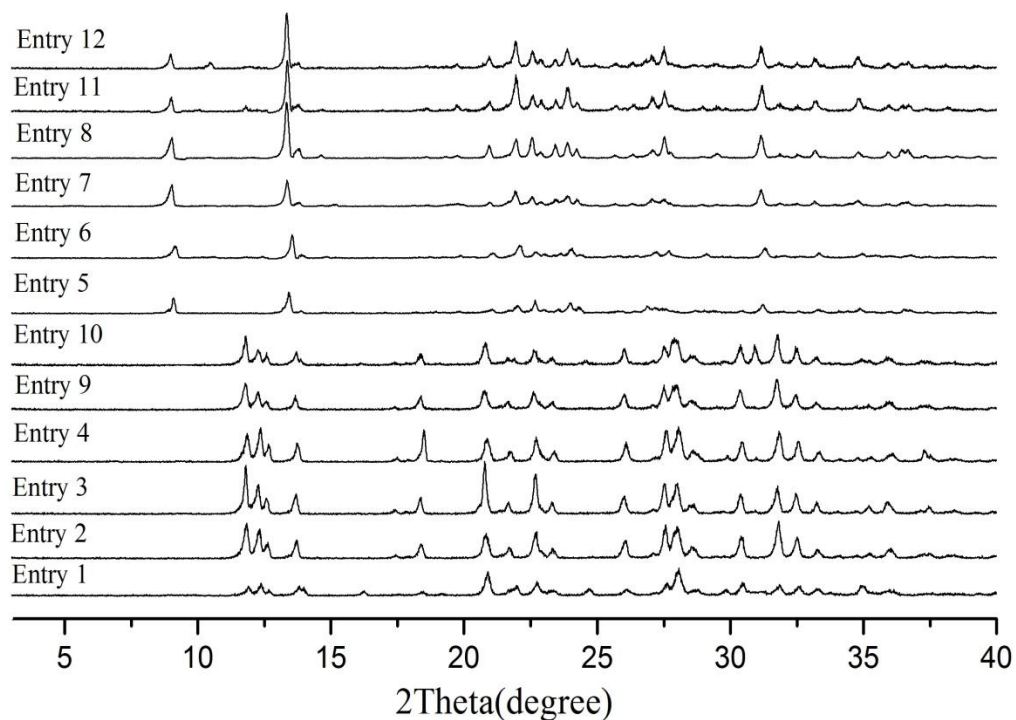

**Figure S4** Powder XRD patterns of ZnPO-TETA1 and ZnPO-TETA2 samples obtained under different reaction conditions (see Table 1 in main text).

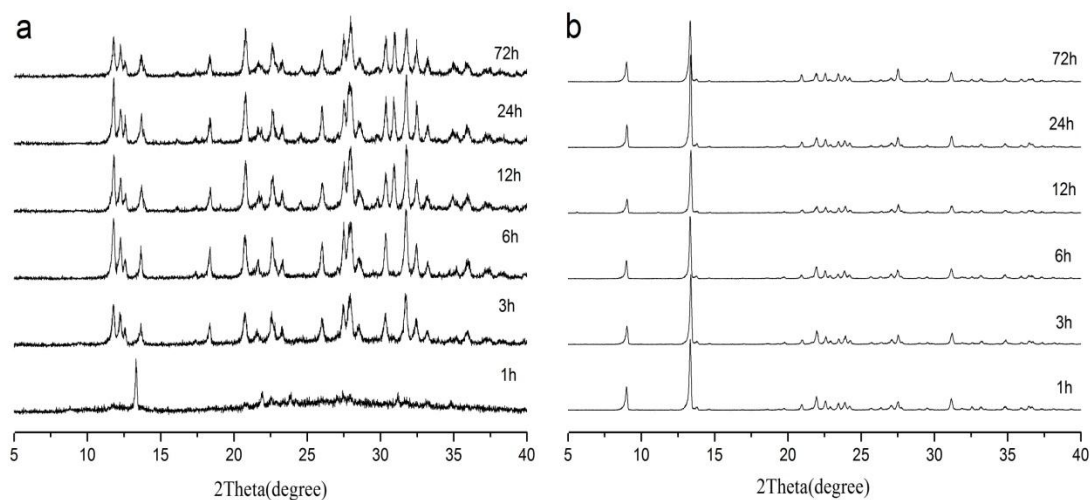

**Figure S5** Powder XRD patterns illustrating the structure evolution of the two zinc phosphates as a function of synthesis time: (a) ZnPO-TETA1; (b) ZnPO-TETA2.
